# Supplementary material for: Huntington’s Disease: Complex Pathogenesis and Therapeutic Strategies
Source: MDPI journal article supplement (doi:10.3390/ijms25073845), 2024-03-29
Supplement: s1 [file s1]

**Table S1. Notable Clinical Trials for HD Treatment**

|                                    | Clinical<br>Trials.gov ID | Trial name | Intervention                             | Mechanism of action                         | Main outcome                                                                               | Phase   | Sponsor                                           | Reference |
|------------------------------------|---------------------------|------------|------------------------------------------|---------------------------------------------|--------------------------------------------------------------------------------------------|---------|---------------------------------------------------|-----------|
| Pharmacological<br>clinical trials | NCT02215616               | LEGATO-HD  | Laquinimod                               | Immunomodulator                             | Not show a significant clinical improvement                                                | Phase 2 | Teva Branded Pharmaceutical<br>Products, R&D Inc. | [273]     |
|                                    | NCT02197130               | Amaryllis  | PF-02545920                              | Phosphodiesterase-10A<br>(PDE-10) inhibitor | No improvement                                                                             | Phase 2 | Pfizer                                            | -         |
|                                    | NCT02006472               | PRIDE-HD   | Pridopidine                              | D2R Antagonist                              | Improve motor function, and reduce the probability of Total<br>Functional Capacity decline | Phase 2 | Prilenia                                          | [274-276] |
|                                    | NCT04102579               | KINECT-HD  | Valbenazine                              | VMAT2 inhibitor                             | Improve chorea                                                                             | Phase 3 | Neurocrine Biosciences                            | [277]     |
|                                    | NCT03575676               |            | SOM3355(bevan<br>tolol<br>hydrochloride) | VMAT2 inhibitor                             | Reduce chorea in patients with HD, well-tolerated                                          | Phase 2 | SOM Innovation Biotech SA                         | [278]     |

---

|             |                   |            |                      |                                                                                                |             |                                                                                                                               |       |
|-------------|-------------------|------------|----------------------|------------------------------------------------------------------------------------------------|-------------|-------------------------------------------------------------------------------------------------------------------------------|-------|
| NCT03225833 | PRECISION-<br>HD1 | WVE-120101 | Allele-selective ASO | No changes in CSF NfL                                                                          | Phase 1/2   | Wave Life Sciences Ltd.                                                                                                       | -     |
| NCT03225846 | PRECISION-<br>HD2 | WVE-120102 | Allele-selective ASO | Show no statistically significant change in mHTT versus placebo                                | Phase 1/2   | Wave Life Sciences Ltd.                                                                                                       | -     |
| NCT05032196 | SELECT-HD         | WVE-003    | Allele-selective ASO | Selectively led to a 22% mean reduction in mHTT while avoiding targeting the wtHTT             | Phase 1b/2a | Wave Life Sciences Ltd.                                                                                                       | -     |
| NCT03761849 | GENERATION HD1    | Tominersen | ASO                  | Tominersen treatment shows worse scores in clinical scales compared to participants on placebo | Phase 3     | Roche                                                                                                                         | -     |
| NCT05686551 | GENERATION HD2    | Tominersen | ASO                  | Showing dose-dependent decrease in CSF mHTT, but not benefit the participants                  | Phase 2     | Roche                                                                                                                         | -     |
| NCT00712426 | CREST-E           | Creatine   | Creatine monohydrate | Not delay functional decline                                                                   | Phase 1/2   | Massachusetts General Hospital<br>University of Rochester<br>National Center for Complementary and Integrative Health (NCCIH) | [279] |

---

|             |            |              |                                                                           |                                                                                                                                                              |           |                                                                   |       |
|-------------|------------|--------------|---------------------------------------------------------------------------|--------------------------------------------------------------------------------------------------------------------------------------------------------------|-----------|-------------------------------------------------------------------|-------|
| NCT02453061 | TRIHEP3    | Triheptanoin | A medium-chain triglyceride indicated to provide calories and fatty acids | Correct the bioenergetic profile in the brain of HD patients                                                                                                 | Phase 2   | Institut National de la Santé Et de la Recherche Médicale, France | [280] |
| NCT05243017 | AMT-130    | AAV5-miHTT   | MicroRNA-based therapeutic agent                                          | Show positive-trending, potentially dose-dependent signals across multiple key clinical and functional measures, in conjunction with further declines in NFL | Phase 1/2 | UniQure                                                           | -     |
| NCT05111249 | VIBRANT-HD | Branaplam    | Splicing modulator                                                        | Show nerve damage                                                                                                                                            | Phase 2   | Novartis Pharmaceuticals                                          | -     |
| NCT04514367 | ANX005     | ANX-005      | C1q inhibitor                                                             | Stabilize and improve functional capacity                                                                                                                    | Phase 2/3 | Annexon, Inc                                                      | -     |
| NCT02481674 | SIGNAL     | Pepinemab    | Anti-semaphorin 4D monoclonal antibody                                    | Reduce caudate brain atrophy and increase in FDG-PET SUVR, improve cognition in early manifest HD                                                            | Phase 2   | Vaccinex Inc., Huntington Study Group                             | [281] |
| NCT05358717 | PIVOT HD   | PTC518       | Small molecule splicing modulator                                         | Result in a dose-dependent lowering of mHTT level                                                                                                            | Phase 2   | PTC therapeutics                                                  | -     |
| NCT05107128 | DIMENSION  | SAGE-718     | Positive allosteric modulator of NMDAR                                    | -                                                                                                                                                            | Phase 2   | Sage Therapeutics                                                 | -     |

|                                            |             |           |                                                |                                                                                                                  |   |           |                                                             |   |
|--------------------------------------------|-------------|-----------|------------------------------------------------|------------------------------------------------------------------------------------------------------------------|---|-----------|-------------------------------------------------------------|---|
|                                            | NCT04826692 | -         | Metformin                                      | Antihyperglycemic/AM<br>PK activator                                                                             | - | Phase 3   | Instituto de Investigacion Sanitaria<br>La Fe               | - |
|                                            | NCT05541627 | -         | AB-1001                                        | An adeno-associated<br>viral vector serotype<br>Rh10 containing the<br>human cholesterol 24-<br>hydroxylase gene | - | Phase 1/2 | Asklepios Biopharmaceutical<br>(AskBio) / BrainVectis       | - |
| Non-<br>pharmacological<br>clinical trials | NCT04244513 | -         | GPI DBS                                        | Deep brain stimulation                                                                                           | - | -         | Beijing Municipal Administration of<br>Hospitals, Medtronic | - |
|                                            | NCT04219241 | ADORE-EXT | Cellavita                                      | Stem cell therapy                                                                                                | - | Phase 2/3 | Azidus Brasil, Cellavita Pesquisa<br>Científica Ltda        | - |
|                                            | NCT01834053 | BMACHC    | Bone marrow-<br>derived MNC<br>transplantation | Bone marrow transplant                                                                                           | - | Phase 1/2 | Chaitanya Hospital, Pune                                    | - |

|             |         |                   |         |                                                                                                     |   |                    |       |
|-------------|---------|-------------------|---------|-----------------------------------------------------------------------------------------------------|---|--------------------|-------|
| NCT03344601 | PACE-HD | Physical activity | Unknown | Participants in the cohort had motor and functional decline at rates comparable to previous studies | - | Cardiff University | [282] |
|-------------|---------|-------------------|---------|-----------------------------------------------------------------------------------------------------|---|--------------------|-------|

---
